# Supplementary material
Source: ML conference proceedings conference paper supplement (https://proceedings.mlr.press/v97/gultchin19a.html)
Supplement: Supplementary file 1 [file gultchin19a-supp.pdf]

## A. Further Experiment Details

We found many proper nouns and words that would normally be capitalized in the 120,000 most frequent lower-case words from GNEWS. To remove these words, for each capitalized entry, such as *New\_York*, we removed it and also less frequent entries (ignoring spacing) such *newyork* if the lower-case form was less frequent than the upper-case word according to the WE frequency. (For example, the WE has 13 entries that are equivalent to *New\_York* up to capitalization and punctuation.)

To disincentivize people from randomly clicking, a slight pause (600 ms) was introduced between the presentation of each word and the interface required the person to wait until all six words had been presented before clicking. In each presentation, words were shuffled to randomize the effects of positional biases. The fractions of clicks on the different locations did suggest a slight positional bias with click percentages varying from 15.7% to 18.6%.

We refer to the three humor-judging experiments by the numbers of words used: 120k, 8k, and 216. In the 120k experiment, each string was shown to at least three different participants in three different sextuplets. 80,062 strings were not selected by any participant, consistent with EH's finding that the vast majority of words are not found to be funny. The 8k experiment applied the same procedure (except without a "none are humorous" option) to the 8,120 words that were chosen as the most humorous in a majority (1/2 or more) of the sextuples they were shown. Each word was shown to at least 15 different participants in random sextuples. The list of 216 words is in the appendix. A slight inconsistency may be found in the published data in that we have removed duplicates where one person voted on the same word more than once, however in forming our sets of 8,120 and 216 words we did not remove duplicates.

## B. Further Materials and Findings

The 216 top-rated words, sorted in order of mean humor ratings (funniest first), used in the main crowdsourcing experiment:

asshattery, clusterfuck, douchebaggery, poppycock, craptacular, cockamamie, gobbledegook, nincompoops, wanker, kerfuffle, cockle pickers, pussyfooting, tiddlywinks, higgledy piggedly, kumquats, boondoggle, doohickey, annus horribilis, codswallop, shuttlecock, bejeezus, bamboozle, whakapapa, artsy fartsy, pooper scoopers, fugly, dunderheaded, dongles, didgeridoo, dickering, bacon butties, woolly buggers, pooch punt, twaddle, dabbawalas, goober, apeshit, nut butters, hoity toity, glockenspiel, diktats, mollycoddling, pussy willows, bupkis, tighty whities, nut flush, namby pamby, bugaboos, hullabaloo, hoo hah, crapola, jerkbaits, batshit, schnitzels, sexual napalm, arseholes, buffoonery, lollygag, weenies, twat, diddling, cockapoo, boob tube, galumphing, ramrodded, schlubby, poobahs, dickheads, fufu, nutjobs, skedaddle, crack whore, dingbat, bitch slap, razzmatazz, wazoo, schmuck, cock ups, boobies, cummerbunds, stinkbait, gazumped, moobs, bushwhacked, dong, pickleball, rat ass, bootlickers, skivvies, belly putter, spelunking, faffing, spermatogenesis, butt cheeks, blue tits, monkeypox, cuckolded, wingnuts, muffed punt, ballyhoo, niggly, cocksure, oompah, trillion dong, shiitake, cockling, schlocky, portaloos, pupusas, thrust reverser, pooja, schmaltzy, wet noodle, piggeries, weaner, chokecherry, tchotchkes, titties, doodad, troglodyte, nookie, annulus, poo poo, semen samples, nuttled, foppish, muumuu, poundage, drunken yobs, yabbies, chub, butt whipping, noobs, ham fist, pee pee, woo woo, squeegee, flabbergasted, yadda yadda, dangdut, coxless pairs, twerps, tootsies, big honkin, porgies, dangly, guffawing, wussies, thingies, bunkum, wedgie, kooky, knuckleheads, nuttin, mofo, fishmonger, thwack, teats, peewee, cocking, wigwams, red wigglers, priggish, hoopla, poo, twanged, snog, pissy, poofy, newshole, dugong, goop, whacking, viagogo, chuppah, fruitcakes, caboose, cockfights, hippocampus, vindaloo, holeshoot, hoodoo, clickety clack, backhoes, loofah, skink, party poopers, civvies, quibble, whizzy, gigolo, bunged, whupping, weevil, spliffs, toonie, gobby, infarct, chuffed, gassy, crotches, chits, proggy, doncha, yodelling, snazzy, fusarium, bitty, warbled, guppies, noshes, dodgems, lard, meerkats, lambast, chawl

Tables 7 and 4 present binary comparisons of the funniest words by gender (female vs. male) and nationality (India vs. U.S.).

**Humor in Word Embeddings: Cockamamie Gobbledegook for Nincompoops**

*Table 4.* Among our set of 216 words (including phrases), the ten with most confident differences in ratings from people in India and the U.S. (using a two-sided t-test and Bonferoni correction). There is a strong (0.45) correlation between word length and difference in rating between U.S. and India.

| Word rated funnier in India | adjusted p-value | Word rated funnier in U.S. | adjusted p-value |
|-----------------------------|------------------|----------------------------|------------------|
| poo poo                     | 6.2e-14          | codswallop                 | 4.5e-25          |
| pissy                       | 2.4e-12          | craptacular                | 5.7e-22          |
| woo woo                     | 5.4e-12          | asshattery                 | 4.2e-20          |
| poofy                       | 9.2e-11          | kerfuffle                  | 1.3e-19          |
| gigolo                      | 3.2e-10          | gobbledegook               | 3e-18            |
| muumuu                      | 4.5e-10          | glockenspiel               | 2.9e-17          |
| pee pee                     | 6.2e-10          | clusterfuck                | 2.4e-16          |
| guppies                     | 2.4e-09          | ramrodded                  | 1.8e-13          |
| gassy                       | 1e-07            | douchebaggery              | 9.4e-13          |
| boobies                     | 4.2e-07          | twaddle                    | 4.7e-12          |

*Table 5.* The ten words rated funniest in our study, their female/male mean rating discrepancy (if significant), and some features of these words.

|               | FM | sound | juxtaposition | colloquial | insulting | sexual | scatological |
|---------------|----|-------|---------------|------------|-----------|--------|--------------|
| asshattery    |    |       | ✓             | ✓          | ✓         | ✓      | ✓            |
| clusterfuck   | M  |       | ✓             | ✓          |           | ✓      | ✓            |
| douchebaggery |    |       |               | ✓          | ✓         |        |              |
| poppycock     | M  | ✓     | ✓             |            | ✓         | ✓      |              |
| craptacular   |    |       |               |            | ✓         |        | ✓            |
| cockamamie    | F  |       |               |            | ✓         | ✓      |              |
| gobbledegook  | F  | ✓     |               |            |           |        |              |
| nincompoops   | F  | ✓     | ✓             | ✓          | ✓         |        | ✓            |
| wanker        | M  |       |               | ✓          | ✓         | ✓      |              |
| kerfuffle     | F  | ✓     |               | ✓          |           |        |              |

*Table 6.* 10 most highly annotated words in each humor feature category.

| Colloquial  | Insulting   | Juxtaposition   | Scatological    | Sexual       | Funny sounding    |
|-------------|-------------|-----------------|-----------------|--------------|-------------------|
| dissing     | fuckers     | party poopers   | dog poop        | foreskins    | lollygag          |
| wee lad     | douche      | hippocampus     | dung            | scrotum      | gobbledegook      |
| clusterfuck | dickheads   | pooch punt      | pooper scoopers | nudism       | ballyhoo          |
| twat        | nincompoops | port potties    | poo poo         | nuttet       | tiddlywinks       |
| mofo        | asshat      | bacon butties   | urination       | blue tits    | higgledy piggledy |
| fugly       | wussies     | sexual napalm   | apeshit         | boobies      | schlubby          |
| flimflam    | twat        | pickleball      | poo             | pussyfooting | hobnobbing        |
| woo woo     | crack whore | pussyfooting    | butt cheeks     | crotches     | hoo hah           |
| crack whore | rat ass     | boob tube       | crapola         | vibrators    | didgeridoo        |
| nutjobs     | smartass    | jobholders rose | diaper clad     | masturbating | poppycock         |

---

**Humor in Word Embeddings: Cockamamie Gobbledegook for Nincompoops**

---

Table 7. Among our set of 216 words (including phrases), the ten with most confident differences in ratings across gender (again using a two-sided t-test and Bonferoni correction).

| Word rated funnier by F | adjusted p-value | Word rated funnier by M | adjusted p-value |
|-------------------------|------------------|-------------------------|------------------|
| whakapapa               | 3.2e-04          | sexual napalm           | 2.1e-11          |
| doohickey               | 0.0011           | poundage                | 1.3e-05          |
| namby pamby             | 0.0014           | titties                 | 2.6e-05          |
| hullabaloo              | 0.003            | dong                    | 3.2e-05          |
| higgledy piggedy        | 0.0039           | jerkbaits               | 7.4e-05          |
| gobbledegook            | 0.0047           | semen samples           | 1.8e-04          |
| schlocky                | 0.008            | nuttled                 | 0.0019           |
| gazumped                | 0.014            | cock ups                | 0.0021           |
| kooky                   | 0.026            | boobies                 | 0.0027           |
| schmaltzy               | 0.033            | nut butters             | 0.004            |
